# Supplementary material
Source: PubMed Central journal article supplement (PMC5839636)
Supplement: NIHMS919295-supplement-Supplementary_Dataset_8.pdf [file NIHMS919295-supplement-Supplementary_Dataset_8.pdf]

```
<html class="gr_mts-files2_nature_com"><head></head><body data-gr-c-s-loaded="true"><pre style="word-wrap: break-word; white-space: pre-wrap;">Fecal artificial colony True
False Oral artificial colony True False

HL-D 0.709629131426 0.00570239496395 0.702142673264 0.00742607286214
0.838683742413 0.0054821367225 0.553330153857 0.0110857153352

HL-M nan nan 0.276167323918 0.0291812076006 0.382850845497 0.0563613514151 nan
nan

HL-K 0.532527554486 0.0127387042157 0.235981772283 0.00431728431866 0.437433528724
0.00723042918066 0.409337614521 0.00943911158186

HL-C 0.243363936111 0.00578525806025 0.219706403102 0.00659247144554
0.381138262532 0.00976289082283 0.352805805371 0.0109498965031

HL-I 0.228491653212 0.00698588694205 0.18104069657 0.00807531009649
0.324320167941 0.0148198483764 0.269479176674 0.0175264562948

HL-J 0.230806750047 0.00859126717919 0.277190997082 0.00824790192588
0.303968915547 0.0108719647441 0.333622439792 0.0104025168906

HL-A 0.680856601002 0.171051360101 0.905163774964 0.00225267551628 0.779551493136
0.0886502698722 0.962557563888 0.00146598635034

HL-E 0.653956844793 0.0169544337438 0.260794625136 0.0037719609021 0.546583694783
0.00681164966428 0.336426736701 0.0105096921412

HL-G 0.233238757428 0.00901571656136 nan nan 0.444250848382 0.0121401662004
nan nan

HL-H 0.207344377381 0.0118370113105 0.22286276549 0.0120354791083 0.359119757912
0.0103208059861 0.311486617033 0.0099611944401

HL-L 0.508058027609 0.0135781771713 0.499818436191 0.0247604106767 0.584340077633
0.0316234929781 0.625611150952 0.0215576741641

HL-N 0.251005295618 0.00645805251413 0.232508227928 0.00750414988301
0.27920365051 0.0115638983032 0.297453802876 0.0132732875781

HL-B 0.253756164635 0.00945625382973 0.235447494975 0.00676722009344
0.400837562578 0.00928626151235 0.354770164347 0.0121250691421

HL-F 0.215833787638 0.00524820278738 0.236928263923 0.00291008547553
0.321890851939 0.00892520739393 0.322935314073 0.00755410151385

Fecal artificial colony True False Oral artificial colony True False

BL-3 0.147001553506 0.0167495484069 0.13743567321 0.0249096582632 0.205029557676
0.0480723288411 0.11890751968 0.0146931099268

BL-9B 0.140229907005 0.0291454254881 0.132017746567 0.0341696384605 0.193595008702
0.00821671823351 0.143166139557 0.016656640237

BL-2 0.147927770138 0.0410861340796 0.0853679721159 0.00887180686397 0.211694475507
0.0325075808777 0.145011493084 0.0292704923813

BL-1 0.156809848814 0.040683843176 0.108517888728 0.0290891236616 0.209227531161
0.0278670523689 0.1425254152 0.0280381131284

BL-4 0.195582464923 0.0193981531545 0.14235889883 0.0169792366956 0.240059052741
0.0264014990562 0.163252896207 0.0277873791407

BL-8 0.153902017629 0.020083667354 0.122232839423 0.017705063601 0.306216093345
0.0431722297004 0.231403944404 0.0254223029849

BL-9A 0.149233208949 0.0350617744692 0.111605302129 0.0305493683189 0.218893100784
0.0287073939198 0.142420747339 0.0274786815598

BL-6 0.152466149819 0.0390863970678 0.100516517446 0.0212089447107 0.186951811824
0.0367183589435 0.121771507693 0.0311868215418

</pre><div class="grammarly-disable-indicator"></div></body></html>
```
